# Supplementary material
Source: PubMed Central journal article supplement (PMC7615131)
Supplement: EMS188204-supplement-Appendix.pdf [file EMS188204-supplement-Appendix.pdf]

## Appendix

### A Computation of elasticities

From Banks et al. (1997), expenditure and price elasticities from a single stage demand system, denoted by  $E_i^x$  and  $E_{ij}^u$  respectively, are given as below:

$$E_i^x = \frac{\mu_i}{w_i} + 1 \quad (A1)$$

$$E_{ij}^u = \frac{\mu_{ij}}{w_i} - \delta_{ij} \quad (A2)$$

Edgerton (1997) illustrates the relationship between demand elasticities in different levels of multistage budgeting process. Unconditional expenditure elasticities can be combined as follow:

$$e_{i(p)}^x = E_i^x \times E_p^x \quad (A3)$$

where  $E_p^x$  is the first-stage expenditure elasticity of demand for outlet  $p$  and  $E_i^x$  is the second-stage expenditure elasticity of demand for food group  $i$  in outlet  $p$ . Substituting (A1) into (A3):

$$e_{i(p)}^x = \left( \frac{\mu_i}{w_i} + 1 \right) \left( \frac{\mu_p}{w_p} + 1 \right) \quad (A4)$$

Similarly, the uncompensated price elasticity of demand for food group  $i$  in outlet  $p$  in respective to change to price change in food group  $j$  in outlet  $p$  is given as

$$e_{ij(p)}^u = E_{ij}^u + E_i^x w_j [1 + E_{pp}^u] \quad (A5)$$

$$e_{ij(p)}^u = \frac{\vartheta_{ij}}{w_i} - \delta_{ij} + w_j \left( \frac{\mu_i}{w_i} + 1 \right) \left[ 1 + \left( \frac{\vartheta_{pp}}{w_p} - \delta_{pp} \right) \right] \quad (A6)$$

As  $\delta_{pp}=1$ , after rearranging the terms

$$e_{ij(p)}^u = \left( \frac{\vartheta_{ij}}{w_j} - \delta_{ij} \right) + \left( \frac{w_j \vartheta_{pp}}{w_p} \right) \left( \frac{\mu_i}{w_i} + 1 \right) \quad (A7)$$

## B The estimation process of demand elasticities

|        |                                                                                                                               |
|--------|-------------------------------------------------------------------------------------------------------------------------------|
| Step 1 | Estimate the adjusted out-of-home expenditure as described in section 3.3.                                                    |
| Step 2 | Estimate eq. 4 to obtain CDP and PDF for the probability of observing a positive purchase in each outlet                      |
| Step 3 | Estimate QUAIDS for the allocation of out-of-home expenditure across outlets using 3SLS                                       |
| Step 4 | Estimate the adjusted expenditure for restaurants as described in section 3.3.                                                |
| Step 5 | Estimate eq. 4 to obtain CDP and PDF for the probability of observing a positive purchase of each food group from restaurants |
| Step 6 | Estimate QUAIDS for the allocation of restaurant expenditure across food groups using 3SLS                                    |
| Step 7 | Repeat steps 4-6 for the other three outlets                                                                                  |
| Step 8 | Calculate elasticities from the above QUAIDS parameters using eq. 9 and 10                                                    |
| Step 9 | Repeat steps 1 to 8 with 1000 bootstrap replications                                                                          |

Note: Steps 1 to 3 are the estimation procedure for the first stage demand while steps 4 to 7 estimate the demand models in the second stage. Step 8 combines the results from both stages.

## C Demand elasticities for food and beverages across out-of-home outlets in Great Britain

|                                                                               | Restaurants |       | Fast-food outlets |       | Food retail |       | Other outlets |       |
|-------------------------------------------------------------------------------|-------------|-------|-------------------|-------|-------------|-------|---------------|-------|
|                                                                               | Estimate    | SE    | Estimate          | SE    | Estimate    | SE    | Estimate      | SE    |
| <b>First Stage: Out-of-home demand across outlets</b>                         |             |       |                   |       |             |       |               |       |
| <b>YED</b>                                                                    | 1.151       | 0.051 | 0.787             | 0.096 | 0.650       | 0.091 | 1.299         | 0.109 |
| <b>PED in response to price changes in</b>                                    |             |       |                   |       |             |       |               |       |
| Restaurants                                                                   | -0.749      | 0.159 | -0.361            | 0.166 | 0.034       | 0.153 | -0.056        | 0.181 |
| Fast-food outlets                                                             | -0.295      | 0.109 | -0.765            | 0.195 | 0.376       | 0.165 | -0.130        | 0.177 |
| Food retail                                                                   | -0.069      | 0.109 | 0.338             | 0.156 | -1.426      | 0.249 | 0.191         | 0.194 |
| Other outlets                                                                 | -0.008      | 0.089 | -0.039            | 0.127 | 0.295       | 0.145 | -1.245        | 0.183 |
| <b>Second Stage: Out-of-home demand across food groups within each outlet</b> |             |       |                   |       |             |       |               |       |
| <b>YED</b>                                                                    |             |       |                   |       |             |       |               |       |
| Main meals                                                                    | 1.425       | 0.111 | 0.779             | 0.110 | 0.727       | 0.237 | 1.741         | 0.320 |
| Quick meals                                                                   | 1.059       | 0.129 | 0.909             | 0.169 | 0.663       | 0.103 | 1.475         | 0.150 |
| Sugary drinks                                                                 | 0.687       | 0.184 | 0.651             | 0.215 | 0.514       | 0.113 | 1.275         | 0.216 |
| Non-sugary drinks                                                             | 0.993       | 0.328 | 0.696             | 0.333 | 0.569       | 0.133 | 1.331         | 0.252 |
| Sweet snacks                                                                  | 1.009       | 0.260 | 0.564             | 0.438 | 0.576       | 0.094 | 0.596         | 0.172 |
| Hot beverages                                                                 | 1.287       | 0.121 | 0.387             | 0.238 | 0.739       | 0.130 | 1.358         | 0.174 |
| Others                                                                        | 1.938       | 0.713 | 1.254             | 1.392 | 0.700       | 0.117 | 0.743         | 0.233 |
| <b>PED for main meals in response to price changes in</b>                     |             |       |                   |       |             |       |               |       |
| Main meals                                                                    | -1.383      | 0.201 | -0.691            | 0.131 | -0.722      | 0.574 | -0.989        | 0.558 |
| Quick meals                                                                   | 0.095       | 0.120 | -0.064            | 0.141 | -0.229      | 1.037 | -0.292        | 0.743 |
| Sugary drinks                                                                 | -0.011      | 0.099 | 0.032             | 0.089 | 0.009       | 0.981 | 0.079         | 0.617 |
| Non-sugary drinks                                                             | -0.038      | 0.133 | 0.007             | 0.077 | -0.033      | 0.803 | -0.103        | 0.653 |
| Sweet snacks                                                                  | 0.100       | 0.133 | 0.048             | 0.079 | 0.013       | 1.008 | -0.017        | 0.729 |
| Hot beverages                                                                 | 0.308       | 0.154 | -0.101            | 0.084 | -0.170      | 0.849 | -0.067        | 0.655 |
| Others                                                                        | 0.143       | 0.163 | 0.005             | 0.096 | -0.113      | 0.924 | -0.013        | 0.628 |
| <b>PED for quick meals in response to price changes in</b>                    |             |       |                   |       |             |       |               |       |
| Main meals                                                                    | 0.261       | 0.241 | -0.173            | 0.192 | -0.034      | 0.178 | -0.060        | 0.140 |
| Quick meals                                                                   | -1.327      | 0.242 | -0.728            | 0.264 | -1.256      | 0.336 | -1.195        | 0.204 |
| Sugary drinks                                                                 | 0.296       | 0.182 | -0.080            | 0.156 | 0.041       | 0.304 | -0.022        | 0.160 |
| Non-sugary drinks                                                             | -0.178      | 0.207 | 0.029             | 0.142 | 0.108       | 0.237 | 0.103         | 0.158 |
| Sweet snacks                                                                  | 0.133       | 0.208 | -0.082            | 0.143 | -0.019      | 0.332 | -0.038        | 0.170 |
| Hot beverages                                                                 | 0.079       | 0.200 | 0.212             | 0.143 | -0.221      | 0.229 | -0.084        | 0.160 |
| Others                                                                        | -0.006      | 0.252 | 0.029             | 0.175 | -0.100      | 0.305 | -0.021        | 0.147 |
| <b>PED for sugary drinks in response to price changes in</b>                  |             |       |                   |       |             |       |               |       |
| Main meals                                                                    | 0.036       | 0.379 | 0.283             | 0.276 | -0.043      | 0.329 | 0.150         | 0.352 |

|                                                                  |        |       |        |       |        |       |        |       |
|------------------------------------------------------------------|--------|-------|--------|-------|--------|-------|--------|-------|
| Quick meals                                                      | 0.589  | 0.354 | -0.174 | 0.386 | 0.122  | 0.593 | -0.077 | 0.432 |
| Sugary drinks                                                    | -1.502 | 0.520 | -0.380 | 0.400 | -1.204 | 0.584 | -1.658 | 0.373 |
| Non-sugary drinks                                                | -0.169 | 0.324 | -0.339 | 0.274 | -0.420 | 0.466 | 0.207  | 0.388 |
| Sweet snacks                                                     | -0.104 | 0.335 | 0.188  | 0.242 | -0.288 | 0.632 | 0.298  | 0.413 |
| Hot beverages                                                    | 0.368  | 0.391 | -0.268 | 0.241 | 0.349  | 0.413 | -0.301 | 0.375 |
| Others                                                           | 0.084  | 0.413 | -0.046 | 0.276 | 0.135  | 0.560 | 0.173  | 0.353 |
| <b>PED for non-sugary drinks in response to price changes in</b> |        |       |        |       |        |       |        |       |
| Main meals                                                       | -0.175 | 0.527 | 0.185  | 0.450 | -0.098 | 0.410 | -0.196 | 0.429 |
| Quick meals                                                      | -0.592 | 0.460 | 0.200  | 0.586 | 0.264  | 0.759 | 0.302  | 0.578 |
| Sugary drinks                                                    | -0.326 | 0.497 | -0.553 | 0.512 | -0.500 | 0.696 | 0.246  | 0.501 |
| Non-sugary drinks                                                | -1.145 | 0.532 | -0.133 | 0.514 | -0.845 | 0.554 | -0.570 | 0.524 |
| Sweet snacks                                                     | 0.513  | 0.449 | 0.044  | 0.401 | 0.093  | 0.775 | -0.509 | 0.487 |
| Hot beverages                                                    | 1.152  | 0.517 | -0.368 | 0.435 | -0.043 | 0.561 | -0.317 | 0.484 |
| Others                                                           | -0.113 | 0.615 | -0.121 | 0.476 | -0.265 | 0.722 | -0.201 | 0.450 |
| <b>PED for sweet snacks in response to price changes in</b>      |        |       |        |       |        |       |        |       |
| Main meals                                                       | 0.544  | 0.425 | 0.562  | 0.455 | 0.020  | 0.182 | -0.013 | 0.250 |
| Quick meals                                                      | 0.305  | 0.368 | -0.325 | 0.554 | 0.031  | 0.346 | 0.142  | 0.366 |
| Sugary drinks                                                    | -0.127 | 0.347 | 0.301  | 0.507 | -0.163 | 0.322 | 0.217  | 0.327 |
| Non-sugary drinks                                                | 0.323  | 0.381 | 0.043  | 0.503 | 0.031  | 0.267 | -0.266 | 0.304 |
| Sweet snacks                                                     | -1.010 | 0.499 | -1.076 | 0.463 | -1.265 | 0.356 | -1.110 | 0.317 |
| Hot beverages                                                    | -0.513 | 0.413 | -0.212 | 0.492 | -0.011 | 0.244 | 0.122  | 0.313 |
| Others                                                           | -0.237 | 0.536 | -0.010 | 0.632 | 0.015  | 0.317 | -0.083 | 0.266 |
| <b>PED for hot beverages in response to price changes in</b>     |        |       |        |       |        |       |        |       |
| Main meals                                                       | 0.399  | 0.185 | -0.190 | 0.296 | -0.020 | 0.286 | 0.016  | 0.270 |
| Quick meals                                                      | 0.020  | 0.151 | 0.680  | 0.363 | -0.405 | 0.593 | -0.119 | 0.325 |
| Sugary drinks                                                    | 0.085  | 0.140 | -0.179 | 0.279 | 0.195  | 0.554 | -0.150 | 0.275 |
| Non-sugary drinks                                                | 0.180  | 0.165 | -0.183 | 0.294 | -0.010 | 0.446 | -0.123 | 0.275 |
| Sweet snacks                                                     | -0.156 | 0.151 | -0.222 | 0.273 | -0.120 | 0.593 | 0.012  | 0.305 |
| Hot beverages                                                    | -1.175 | 0.200 | -0.557 | 0.286 | -1.104 | 0.435 | -0.959 | 0.332 |
| Others                                                           | -0.129 | 0.187 | -0.028 | 0.323 | -0.022 | 0.536 | 0.055  | 0.285 |
| <b>PED for other food in response to price changes in</b>        |        |       |        |       |        |       |        |       |
| Main meals                                                       | 0.839  | 1.017 | -0.003 | 1.236 | -0.013 | 0.259 | -0.102 | 0.417 |
| Quick meals                                                      | 0.001  | 0.820 | -0.154 | 1.371 | -0.233 | 0.512 | 0.017  | 0.548 |
| Sugary drinks                                                    | 0.327  | 0.656 | -0.011 | 1.424 | 0.102  | 0.468 | 0.235  | 0.477 |
| Non-sugary drinks                                                | -0.121 | 1.043 | -0.092 | 1.414 | -0.195 | 0.389 | -0.216 | 0.493 |
| Sweet snacks                                                     | -0.409 | 1.008 | 0.219  | 1.368 | -0.046 | 0.527 | -0.092 | 0.552 |
| Hot beverages                                                    | -1.063 | 0.823 | 0.313  | 1.364 | 0.026  | 0.350 | 0.198  | 0.499 |
| Others                                                           | -0.477 | 1.290 | -1.141 | 1.627 | -1.113 | 0.521 | -1.067 | 0.424 |

(SE=bootstrapped standard errors)
